# Supplementary material for: Source Attribution of the Chemical Warfare Agent Soman Using Position-Specific Isotope Analysis by 2H NMR Spectroscopy: From Precursor to Degradation Product
Source: PubMed Central journal article supplement (PMC8444188; doi:10.1021/acs.analchem.1c01271), 2021-09-01
Supplement: ac1c01271_si_001.pdf [file ac1c01271_si_001.pdf]

## Supporting Information

**Manuscript Title:** Source Attribution of the Chemical Warfare Agent Soman using Position-Specific Isotope Analysis by  $^2\text{H}$  NMR spectroscopy: From precursor to degradation product

**Authors:** Sandra Lindberg\*, Magnus Engqvist, Lina Mören, Crister Åstot, Rikard Norlin

Department of CBRN Defence & Security, The Swedish Defence Research Agency (FOI),  
Cementvägen 20, Umeå, SE-901 82, Sweden

Email: [sandra.lindberg@foi.se](mailto:sandra.lindberg@foi.se)

| <b>Contents:</b>                                                                                       | <b>Page</b> |
|--------------------------------------------------------------------------------------------------------|-------------|
| The difference between $^2\text{H}$ NMR experimental data and deconvolution fit of PinOH-1 (Figure S1) | S-2         |
| The deconvolution fitted shapes of PinOH-1 (Figure S2)                                                 | S-2         |
| The difference between $^2\text{H}$ NMR experimental data and deconvolution fit of PinOH-2 (Figure S3) | S-3         |
| The deconvolution fitted shapes of PinOH-2 (Figure S4)                                                 | S-3         |
| Deconvolution peak list of PinOH-2 (Figure S5)                                                         | S-4         |
| The difference between $^2\text{H}$ NMR experimental data and deconvolution fit of PinOH-3 (Figure S6) | S-5         |
| The deconvolution fitted shapes of PinOH-3 (Figure S7)                                                 | S-5         |
| The difference between $^2\text{H}$ NMR experimental data and deconvolution fit of PMP-c1 (Figure S8)  | S-6         |
| The deconvolution fitted shapes of PMP-c1 (Figure S9)                                                  | S-6         |
| The difference between $^2\text{H}$ NMR experimental data and deconvolution fit of PMP-a2 (Figure S10) | S-7         |
| The deconvolution fitted shapes of PMP-a2 (Figure S11)                                                 | S-7         |
| The difference between $^2\text{H}$ NMR experimental data and deconvolution fit of PMP-b3 (Figure S12) | S-8         |
| The deconvolution fitted shapes of PMP-b3 (Figure S13)                                                 | S-8         |
| Table of all relative peak areas and estimated uncertainties                                           | S-9         |

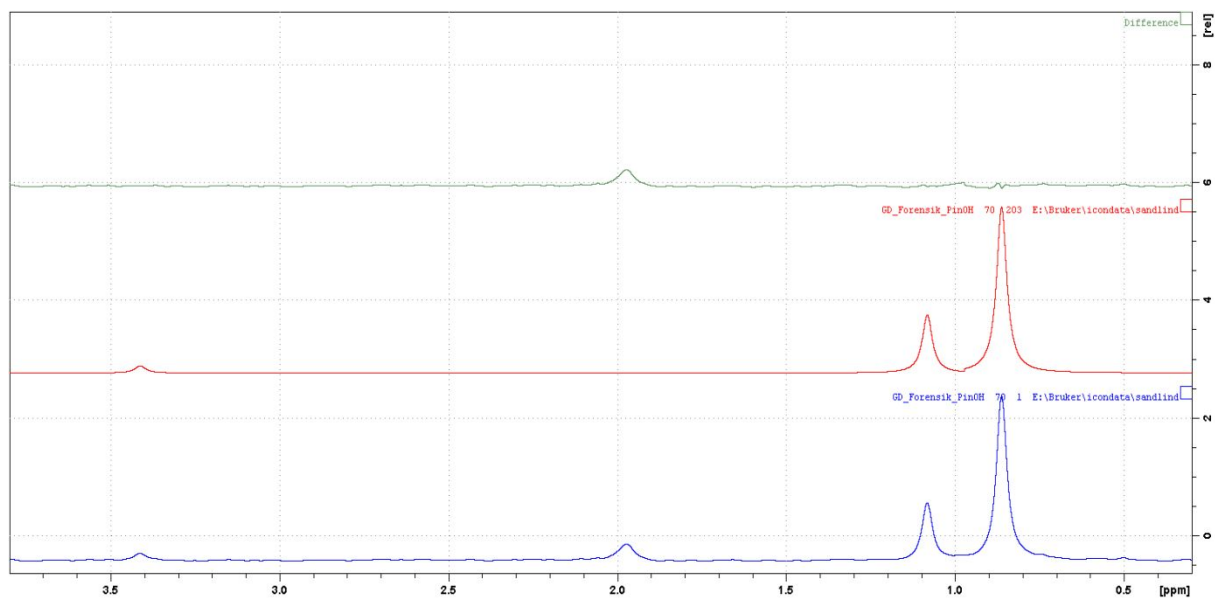

**Figure S1.** Experimental data of PinOH-1 shown at the bottom (blue), the deconvolution fit shown in the middle (red) and the difference at top (green). The truncations in the deconvolution fit is a graphical error and does not affect the numeric calculations.

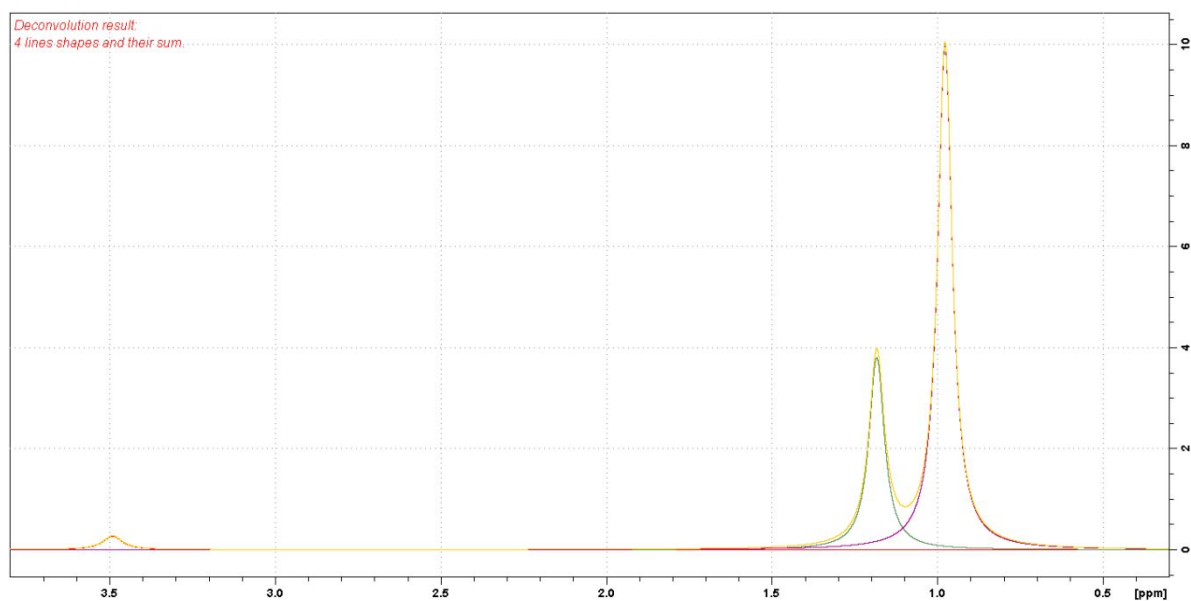

**Figure S2.** The fitted shapes and calculated area of the deconvolution of PinOH-1. The fit is performed with a 100% Lorentzian lineshape for the different peaks; **H** (red), **Me** (green) and **tBu** (purple).

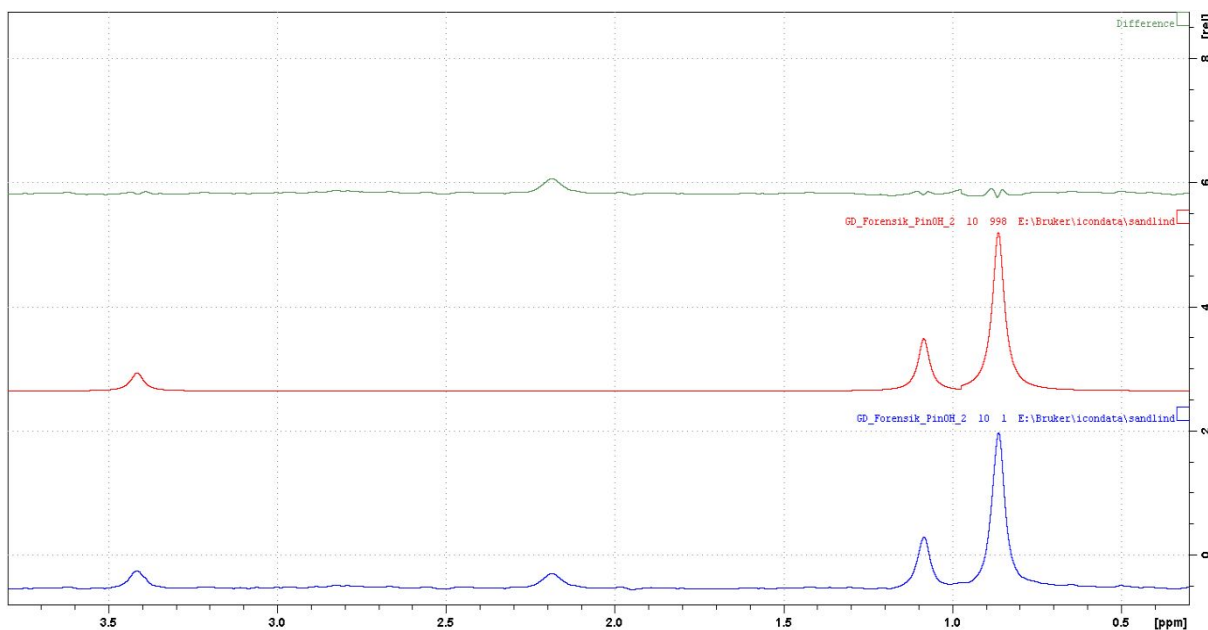

**Figure S3.** Experimental data of PinOH-2 shown at the bottom (blue), the deconvolution fit shown in the middle (red) and the difference at top (green). The truncations in the deconvolution fit is a graphical error and does not affect the numeric calculations.

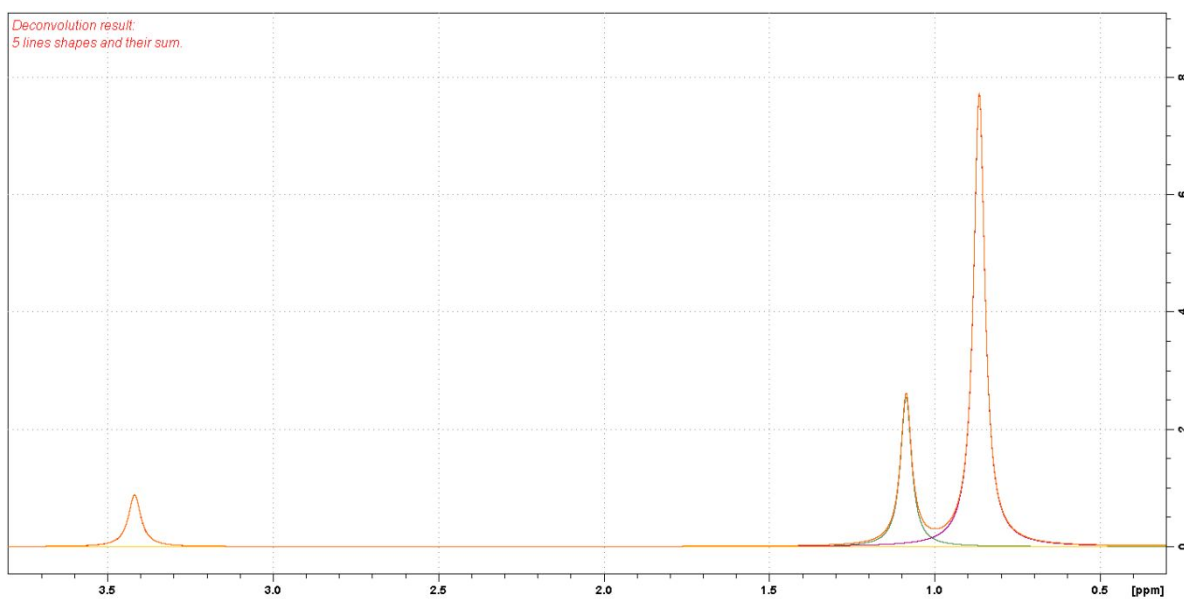

**Figure S4.** The fitted shapes and calculated area of the deconvolution of PinOH-2. The fit is performed with a 100% Lorentzian lineshape for the different peaks; **H** (red), **Me** (green) and **tBu** (purple).

Tue May 25 11:11:46 CEST 2021

Data set: E:/Bruker/icondata/sandlind/GD\_Forensik\_PinOH\_2/10/pdata/1/

Fit type: Mixed Lorentzian and Gaussian

| Fit  | Frequency |        | Width   |       | Intensity | Area     | %Lor.<br>chisq     |
|------|-----------|--------|---------|-------|-----------|----------|--------------------|
|      | ppm       | Hz     | ppm     | Hz    |           |          |                    |
| 1    | 7.284     | 559.19 | 0.03741 | 2.872 | 10.270    | 1977.524 | 1.1e+016<br>100.00 |
| STD: | 0.000     | 0.00   | 0.00008 | 0.006 | 0.015     |          |                    |
| 2    | 3.416     | 262.25 | 0.04448 | 3.415 | 0.883     | 202.069  | 2.5e+015<br>100.00 |
| STD: | 0.000     | 0.01   | 0.00037 | 0.028 | 0.005     |          |                    |
| 3    | 1.085     | 83.30  | 0.03963 | 3.042 | 2.546     | 519.162  | 1.4e+016<br>100.00 |
| STD: | 0.000     | 0.01   | 0.00045 | 0.034 | 0.020     |          |                    |
| 4    | 0.864     | 66.35  | 0.04096 | 3.144 | 7.704     | 1623.949 | 1.8e+015<br>100.00 |
| STD: | 0.000     | 0.00   | 0.00008 | 0.006 | 0.011     |          |                    |
| 5    | -0.016    | -1.25  | 0.03699 | 2.840 | 5.041     | 959.743  | 7e+014<br>100.00   |
| STD: | 0.000     | 0.00   | 0.00008 | 0.006 | 0.007     |          |                    |

**Figure S5.** An example of a deconvolution peak list of PinOH-2\_1 with numerical data used for normalization of the peak areas; **H** (3.416 ppm), **Me** (1.085 ppm) and **tBu** (0.864 ppm). The CDCl<sub>3</sub> (7.284ppm) and the TMS (-0.016ppm) peaks are not considered in this study. The total peak area is 2345.18 and the normalized areas are; **H** = 0.0862, **Me** = 0.221 and **tBu** = 0.692, see Table S1.

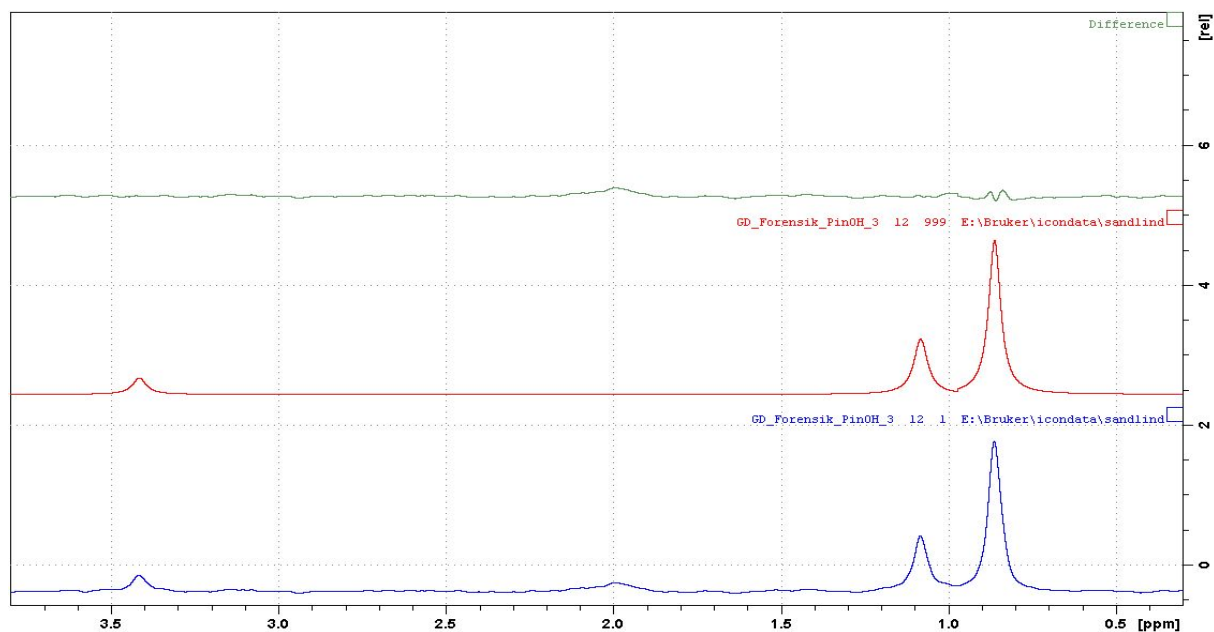

**Figure S6.** Experimental data of PinOH-3 shown at the bottom (blue), the deconvolution fit shown in the middle (red) and the difference at top (green). The truncations in the deconvolution fit is a graphical error and does not affect the numeric calculations.

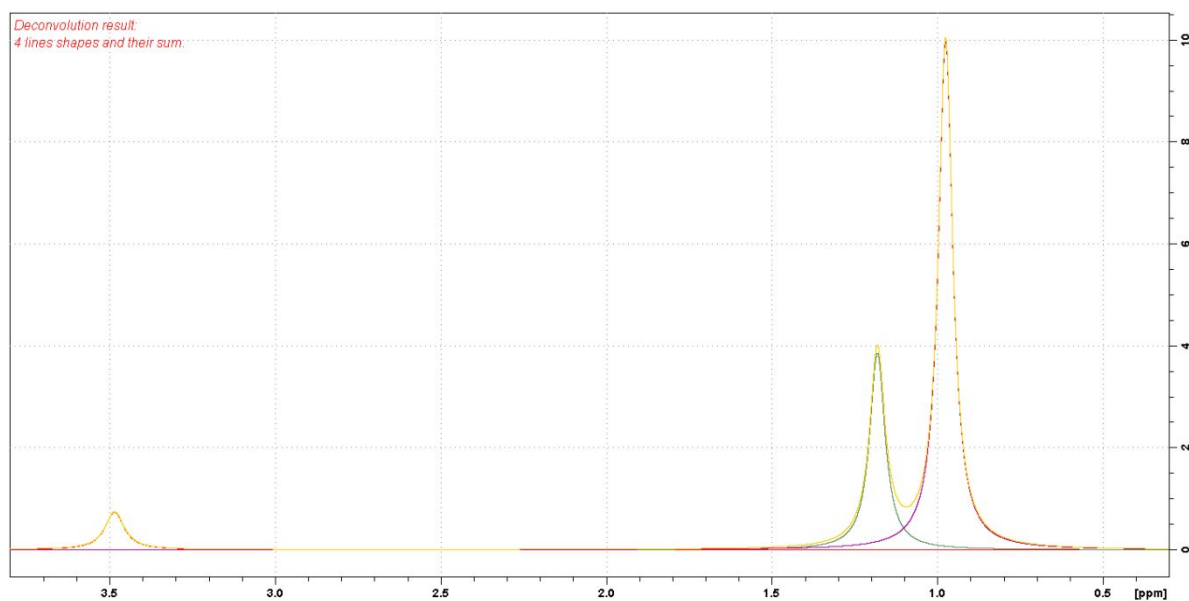

**Figure S7.** The fitted shapes and calculated area of the deconvolution of PinOH-3. The fit is performed with a 100% Lorentzian lineshape for the different peaks; **H** (red), **Me** (green) and **tBu** (purple).

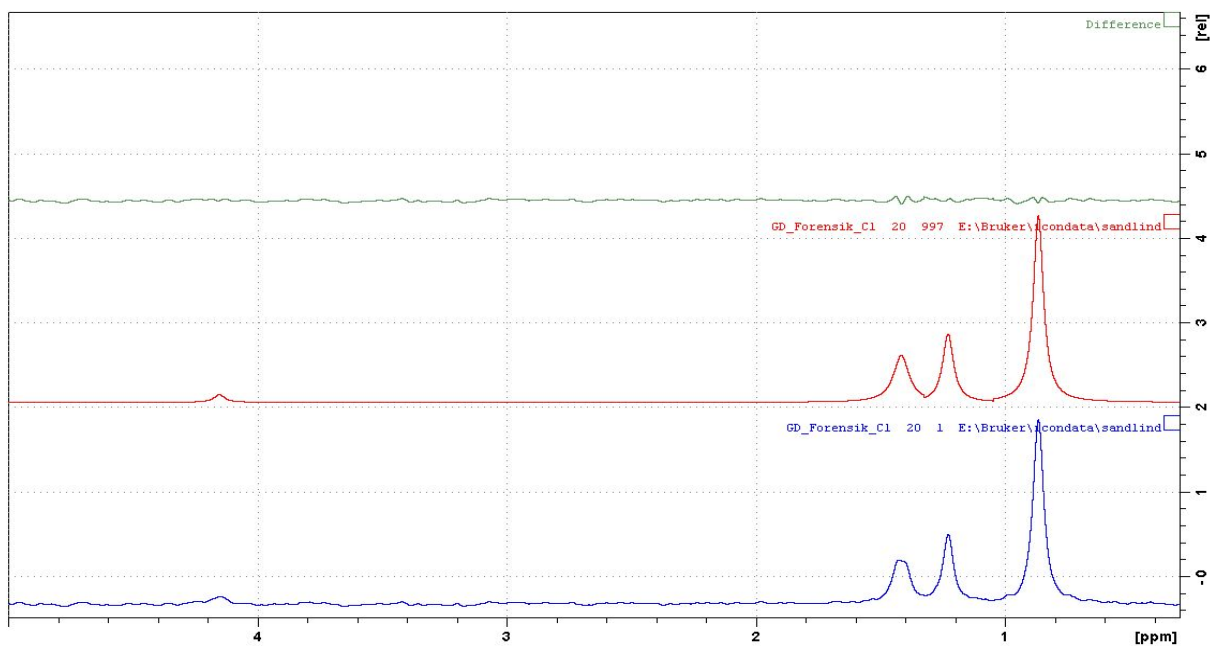

**Figure S8.** Experimental data of PMP-c1 shown at the bottom (blue), the deconvolution fit shown in the middle (red) and the difference at top (green). The truncations in the deconvolution fit is a graphical error and does not affect the numeric calculations.

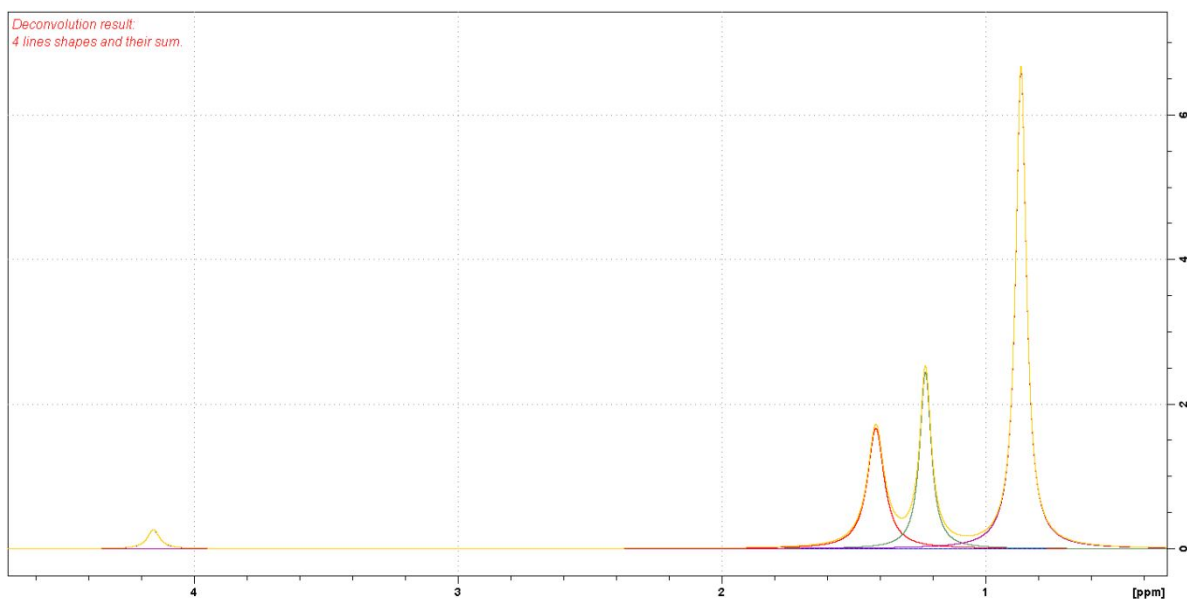

**Figure S9.** The fitted shapes and calculated area of the deconvolution of PMP-c1. The fit is performed with a 100% Lorentzian lineshape for the different peaks; **H** (blue), **Me** (green) and **tBu** (purple). The **MeP** peak (red) is not considered in this study.

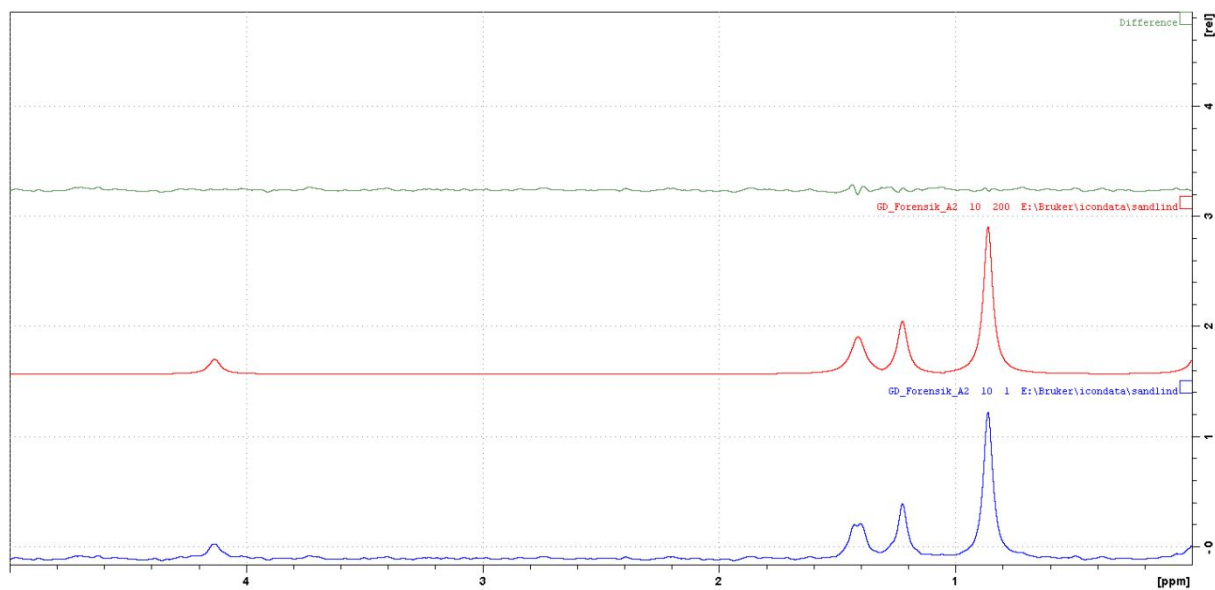

**Figure S10.** Experimental data of PMP-a2 shown at the bottom (blue), the deconvolution fit shown in the middle (red) and the difference at top (green). The truncations in the deconvolution fit is a graphical error and does not affect the numeric calculations.

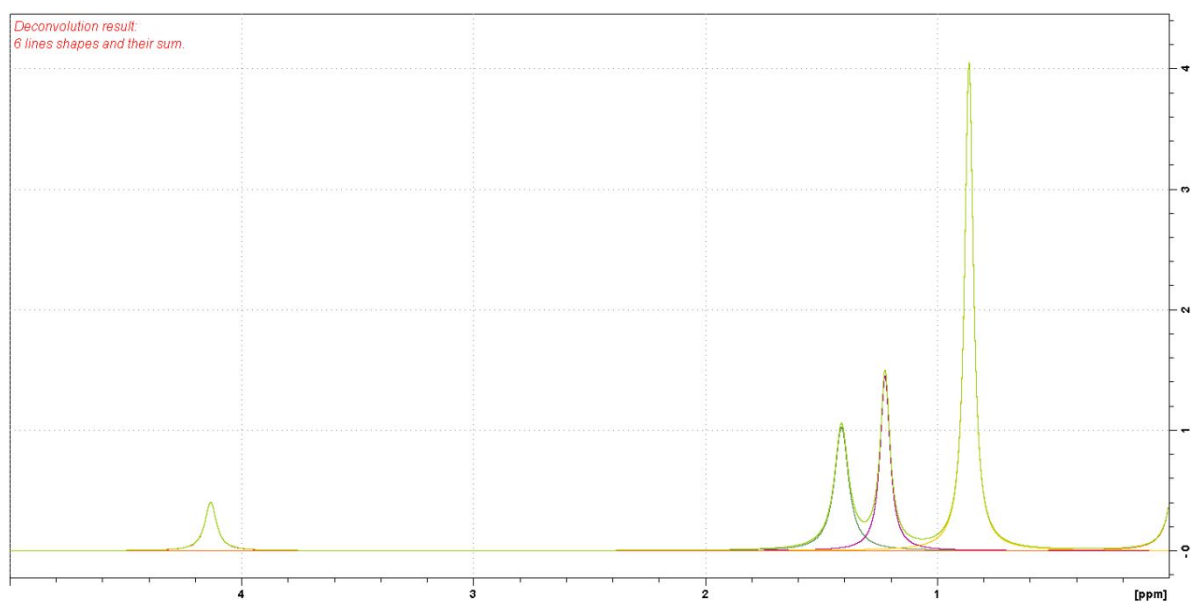

**Figure S11.** The fitted shapes and calculated area of the deconvolution of PMP-a2. The fit is performed with a 100% Lorentzian lineshape for the different peaks; **H** (light green), **Me** (purple) and **tBu** (yellow). The **MeP** peak (dark green) is not considered in this study.

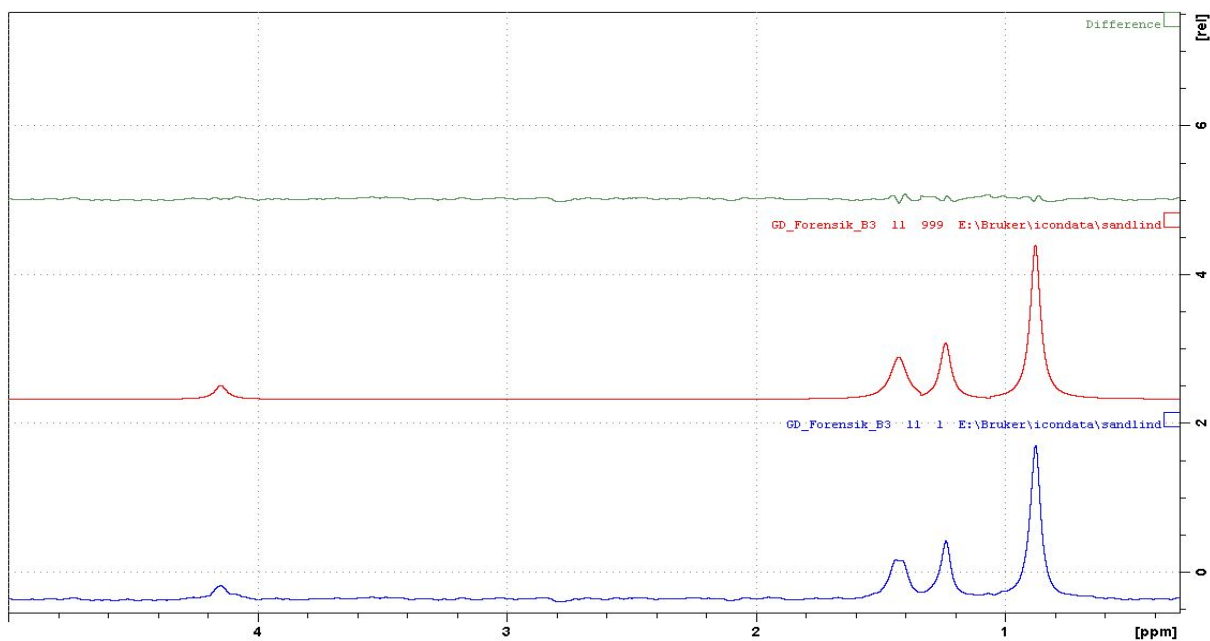

**Figure S12.** Experimental data of PMP-b3 shown at the bottom (blue), the deconvolution fit shown in the middle (red) and the difference at top (green). The truncations in the deconvolution fit is a graphical error and does not affect the numeric calculations.

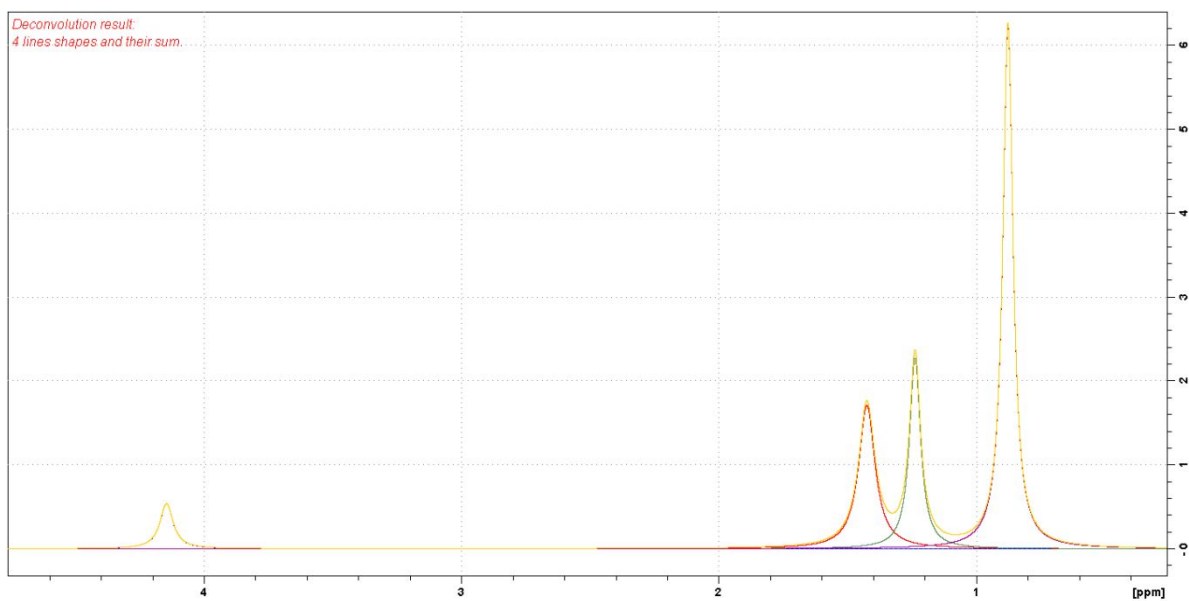

**Figure S13.** The fitted shapes and calculated area of the deconvolution of PMP-b3. The fit is performed with a 100% Lorentzian lineshape for the different peaks; **H** (blue), **Me** (green) and **tBu** (purple). The **MeP** peak (red) is not considered in this study.



**Table S1.** Table of relative peak areas for all three replicates with estimated uncertainties (SD).

|              | <b>PinOH-1_1</b> | <b>PinOH-1_2</b> | <b>PinOH-2_1</b> | <b>PinOH-2_2</b> | <b>PinOH-3_1</b> | <b>PinOH-3_2</b> | <b>PMP-a1</b> | <b>PMP-b1</b> | <b>PMP-c1</b> | <b>PMP-a2</b> | <b>PMP-b2</b> | <b>PMP-c2</b> | <b>PMP-a3</b> | <b>PMP-b3</b> | <b>PMP-c3</b> |
|--------------|------------------|------------------|------------------|------------------|------------------|------------------|---------------|---------------|---------------|---------------|---------------|---------------|---------------|---------------|---------------|
| <i>H_1</i>   | 0.0325           | 0.0258           | 0.0862           | 0.0857           | 0.0721           | 0.0573           | 0.0186        | 0.0216        | 0.0297        | 0.0853        | 0.0739        | 0.0686        | 0.0735        | 0.0638        | 0.0714        |
| <i>H_2</i>   | 0.025            | 0.0231           | 0.0758           | 0.0862           | 0.0632           | 0.062            | 0.0247        | 0.0224        | 0.023         | 0.0832        | 0.068         | 0.0857        | 0.0668        | 0.0709        | 0.0724        |
| <i>H_3</i>   | 0.0268           | 0.0251           | 0.0783           | 0.0849           | 0.0794           | 0.0647           | 0.0352        | 0.0273        | 0.0243        | 0.0716        | 0.0721        | 0.086         | 0.0557        | 0.053         | 0.0712        |
| <i>Mean</i>  | 0.0281           | 0.0247           | 0.0801           | 0.0856           | 0.0716           | 0.0613           | 0.0262        | 0.0238        | 0.0257        | 0.0800        | 0.0713        | 0.0801        | 0.0653        | 0.0626        | 0.0717        |
| <i>SD</i>    | 0.00392          | 0.00140          | 0.00543          | 0.000656         | 0.00811          | 0.00375          | 0.00840       | 0.00309       | 0.00355       | 0.00738       | 0.00302       | 0.00996       | 0.00899       | 0.00901       | 0.000643      |
|              | <b>PinOH-1_1</b> | <b>PinOH-1_2</b> | <b>PinOH-2_1</b> | <b>PinOH-2_2</b> | <b>PinOH-3_1</b> | <b>PinOH-3_2</b> | <b>PMP-a1</b> | <b>PMP-b1</b> | <b>PMP-c1</b> | <b>PMP-a2</b> | <b>PMP-b2</b> | <b>PMP-c2</b> | <b>PMP-a3</b> | <b>PMP-b3</b> | <b>PMP-c3</b> |
| <i>Me_1</i>  | 0.249            | 0.272            | 0.221            | 0.255            | 0.272            | 0.275            | 0.281         | 0.274         | 0.271         | 0.263         | 0.25          | 0.255         | 0.261         | 0.264         | 0.241         |
| <i>Me_2</i>  | 0.256            | 0.274            | 0.254            | 0.250            | 0.267            | 0.274            | 0.255         | 0.274         | 0.266         | 0.249         | 0.257         | 0.248         | 0.266         | 0.262         | 0.252         |
| <i>Me_3</i>  | 0.256            | 0.277            | 0.238            | 0.249            | 0.271            | 0.271            | 0.272         | 0.274         | 0.27          | 0.24          | 0.257         | 0.253         | 0.263         | 0.28          | 0.253         |
| <i>Mean</i>  | 0.254            | 0.274            | 0.238            | 0.251            | 0.27             | 0.273            | 0.269         | 0.274         | 0.269         | 0.251         | 0.255         | 0.252         | 0.263         | 0.269         | 0.249         |
| <i>SD</i>    | 0.00404          | 0.00252          | 0.0165           | 0.00322          | 0.00265          | 0.00208          | 0.0132        | 0             | 0.00265       | 0.0116        | 0.00404       | 0.00361       | 0.00252       | 0.00987       | 0.00666       |
|              | <b>PinOH-1_1</b> | <b>PinOH-1_2</b> | <b>PinOH-2_1</b> | <b>PinOH-2_2</b> | <b>PinOH-3_1</b> | <b>PinOH-3_2</b> | <b>PMP-a1</b> | <b>PMP-b1</b> | <b>PMP-c1</b> | <b>PMP-a2</b> | <b>PMP-b2</b> | <b>PMP-c2</b> | <b>PMP-a3</b> | <b>PMP-b3</b> | <b>PMP-c3</b> |
| <i>tBu_1</i> | 0.718            | 0.702            | 0.692            | 0.660            | 0.656            | 0.667            | 0.7           | 0.704         | 0.699         | 0.652         | 0.676         | 0.676         | 0.665         | 0.673         | 0.688         |
| <i>tBu_2</i> | 0.719            | 0.703            | 0.67             | 0.664            | 0.67             | 0.664            | 0.72          | 0.704         | 0.711         | 0.668         | 0.675         | 0.666         | 0.667         | 0.667         | 0.676         |
| <i>tBu_3</i> | 0.718            | 0.698            | 0.683            | 0.666            | 0.65             | 0.665            | 0.693         | 0.698         | 0.705         | 0.688         | 0.671         | 0.661         | 0.682         | 0.667         | 0.676         |
| <i>Mean</i>  | 0.718            | 0.701            | 0.682            | 0.663            | 0.659            | 0.665            | 0.704         | 0.702         | 0.705         | 0.669         | 0.674         | 0.668         | 0.671         | 0.669         | 0.68          |
| <i>SD</i>    | 0.000577         | 0.00265          | 0.0111           | 0.00306          | 0.0103           | 0.00153          | 0.0140        | 0.00346       | 0.006         | 0.0180        | 0.00265       | 0.00764       | 0.00930       | 0.00346       | 0.00693       |
